# Supplementary material for: Hydrolytic behaviour of mono- and dithiolato-bridged dinuclear arene ruthenium complexes and their interactions with biological ligands
Source: Royal Society of Chemistry journal article supplement (doi:10.1039/c6ra07701c), 2016-01-01
Supplement: c6ra07701c1.pdf [file c6ra07701c1.pdf]

## Supporting information

# **Hydrolytic behaviour of mono-and dithiolato-bridged dinuclear arene ruthenium complexes and their interactions with biological ligands**

**David Stibal,<sup>a</sup> Lennart Geiser,<sup>b</sup> Georg Süss-Fink,<sup>a</sup> Julien Furrer<sup>a,b</sup>**

<sup>a</sup>Institut de Chimie, Université de Neuchâtel, CH-2000 Neuchâtel, Switzerland

<sup>b</sup>Departement für Chemie und Biochemie, Universität Bern, CH-3012 Bern, Switzerland

email: [julien.furrer@dcb.unibe.ch](mailto:julien.furrer@dcb.unibe.ch); Fax: +41 31 631 48 57

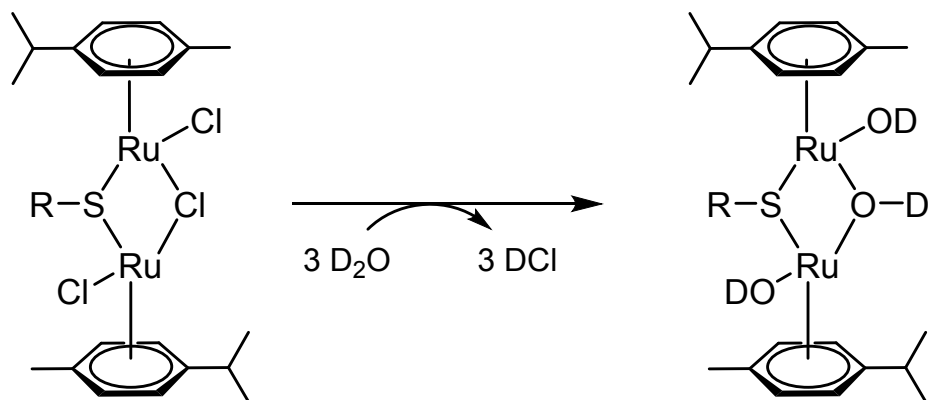

**Scheme S1-** Hydrolysis of the monothiolato complexes **1** and **2** in D<sub>2</sub>O/acetone-d<sub>6</sub>.

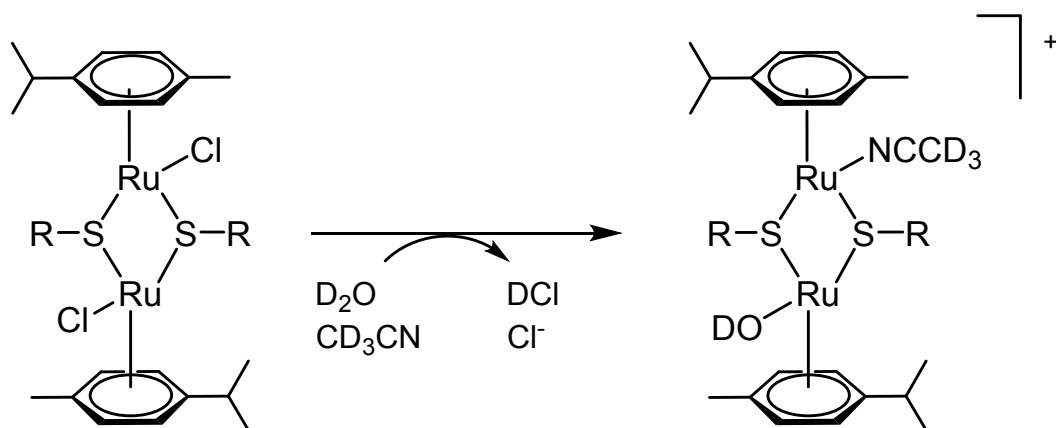

**Scheme S2-** Hydrolysis of the monothiolato complexes **3** and **4** in D<sub>2</sub>O/CD<sub>3</sub>CN.

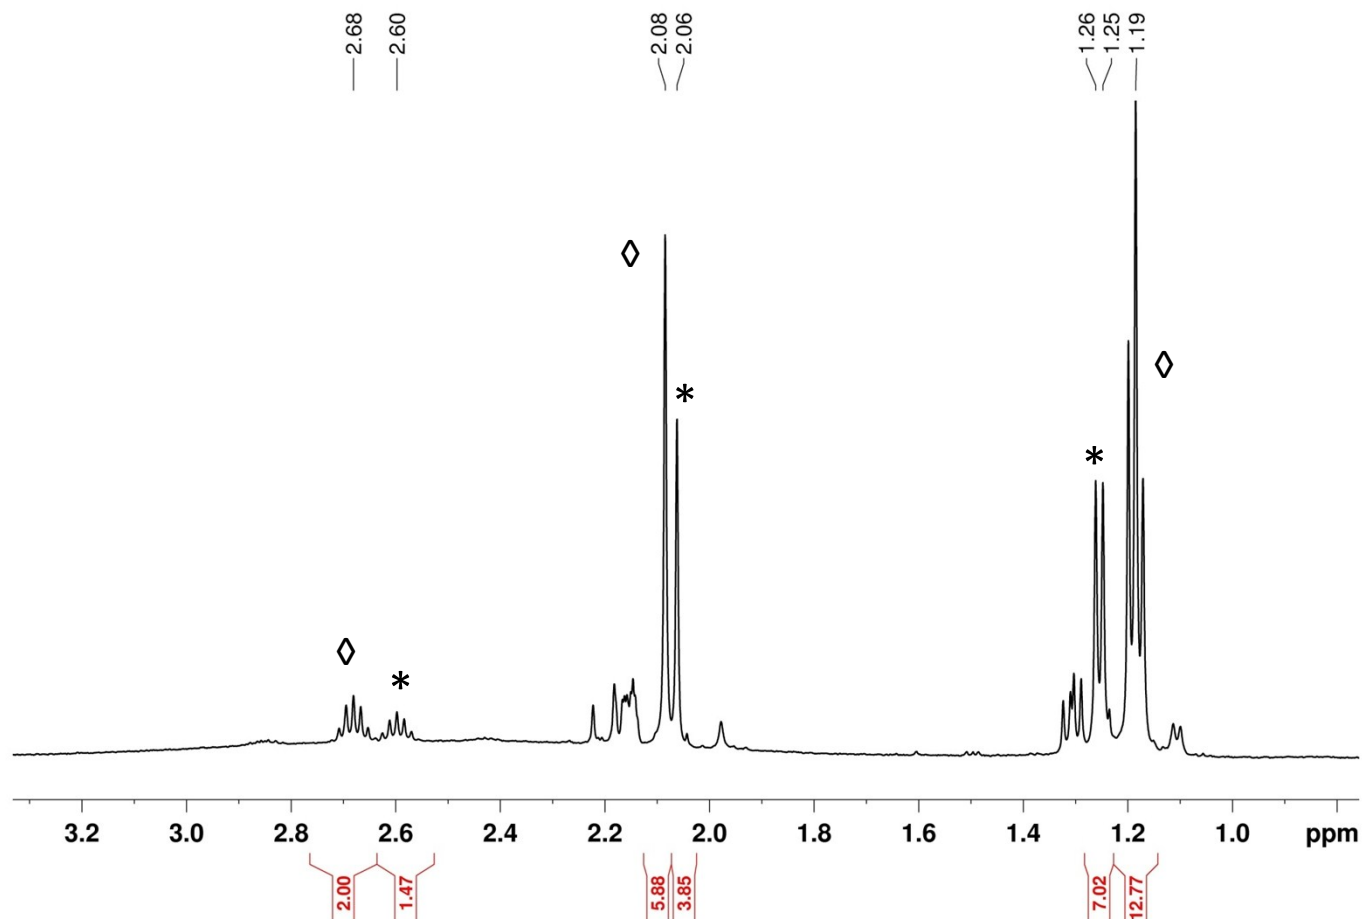

**Fig. S1** – High field part of the  $^1\text{H}$  NMR spectrum of  $[(\eta^6\text{-p-MeC}_6\text{H}_4\text{Pr}^i)_2\text{Ru}_2\text{Cl}_2(\mu\text{-Cl})(\mu\text{-S-m-9-B}_{10}\text{C}_2\text{H}_{11})]$  (**1**) dissolved in  $\text{D}_2\text{O}$ /acetone- $\text{d}_6$  (ratio 7 : 3) recorded 24 h after sample preparation, at 37 °C and at pD 7. The labels correspond to *p*-cymene ligands in different species present in solution. The species labeled  $*$  corresponds to complex **1**, and the species labeled  $\diamond$  is the fully hydrolysed complex  $[(\eta^6\text{-p-MeC}_6\text{H}_4\text{-Pr}^i)_2\text{Ru}_2(\text{OD})_2(\mu\text{-OD})(\mu\text{-S-m-9-B}_{10}\text{C}_2\text{H}_{11})]$ . A further characterisation of the minor species also present in the mixture was not attempted due to their very low concentration.

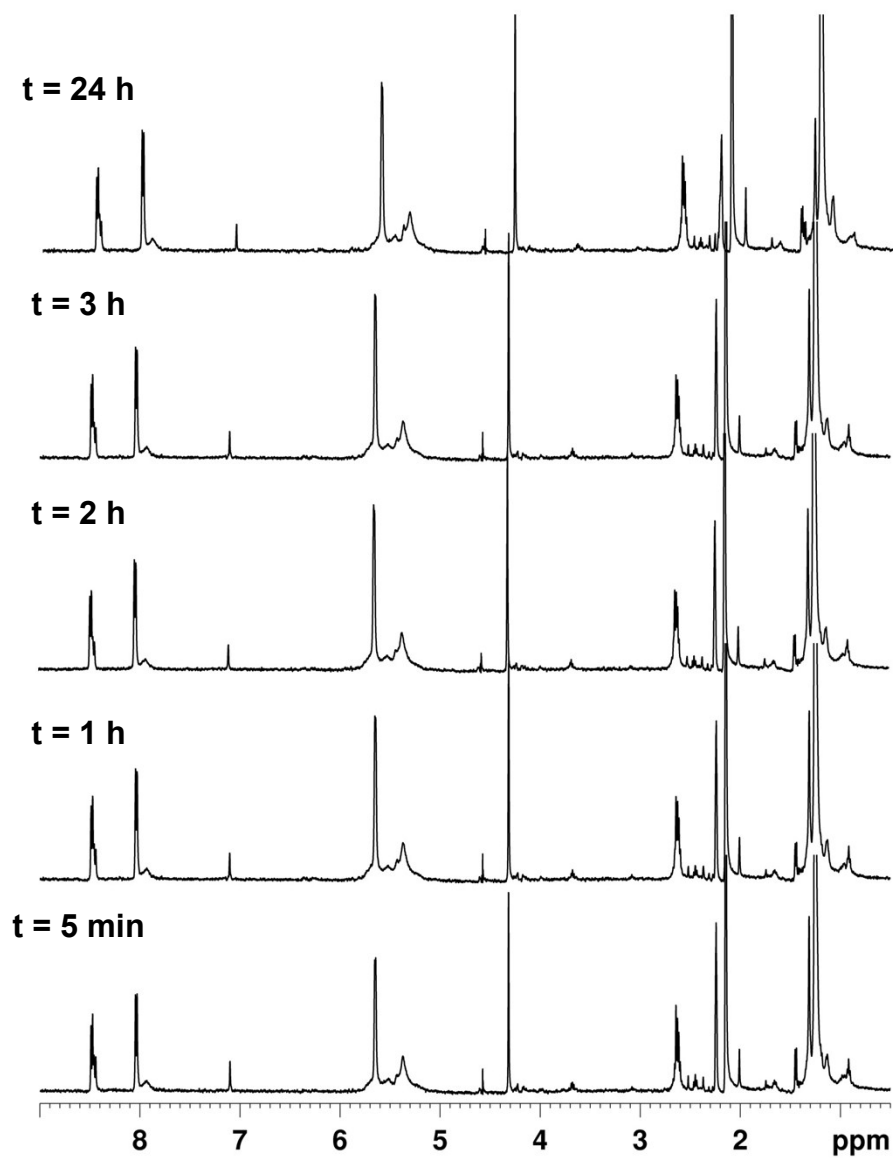

**Fig. S2** - NMR time-courses for the reaction of thiolato complex **2** dissolved in an acetone- $d_6$ /D<sub>2</sub>O mixture (ratio 4 : 6) at pD 7 and 37 °C.

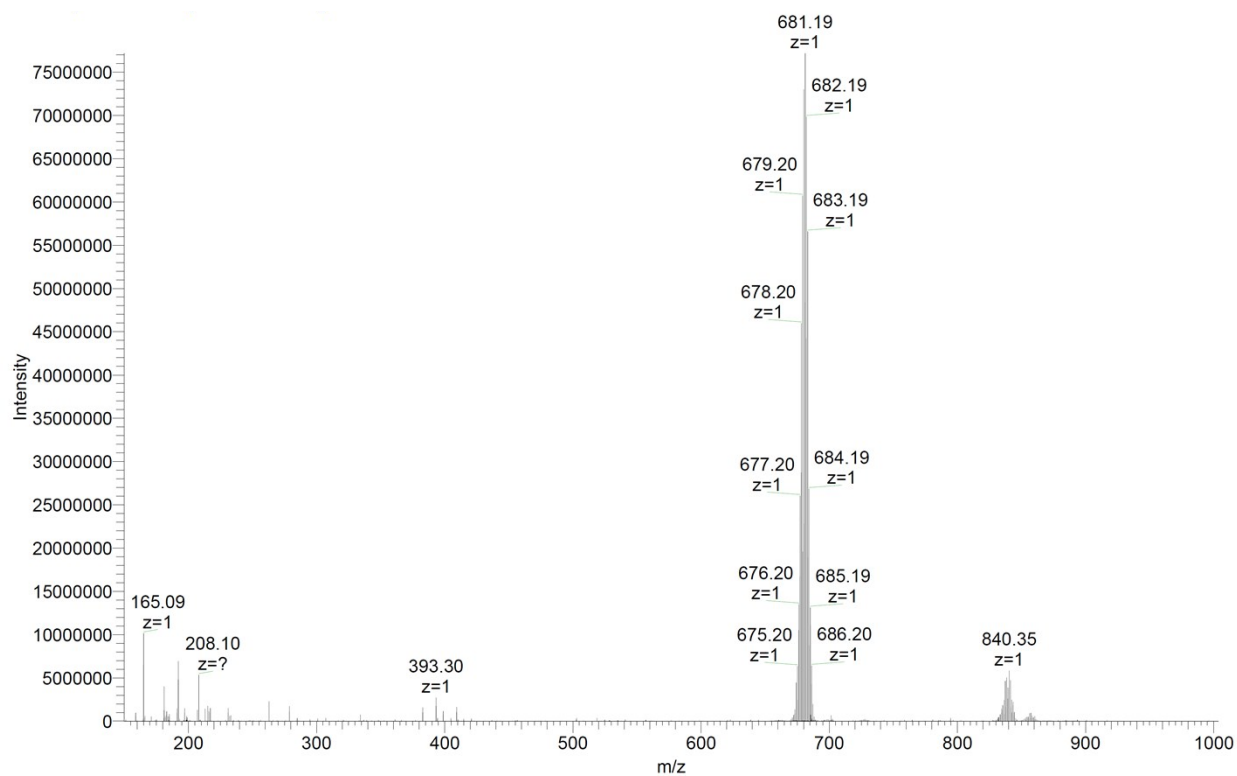

**Fig. S3** – ESI-MS spectrum of **1** dissolved in an acetone- $d_6$ /D $_2$ O mixture (ratio 3:7) recorded at pH 7, 24 h after sample preparation. The ion peak centred at  $m/z$  681.19 corresponds to the fully hydrolysed complex  $[(\eta^6\text{-}p\text{-MeC}_6\text{H}_4\text{Pr}^i)_2\text{Ru}_2(\text{OH})_2(\mu\text{-}S\text{-}m\text{-}9\text{-B}_{10}\text{C}_2\text{H}_{11})]^+$ .

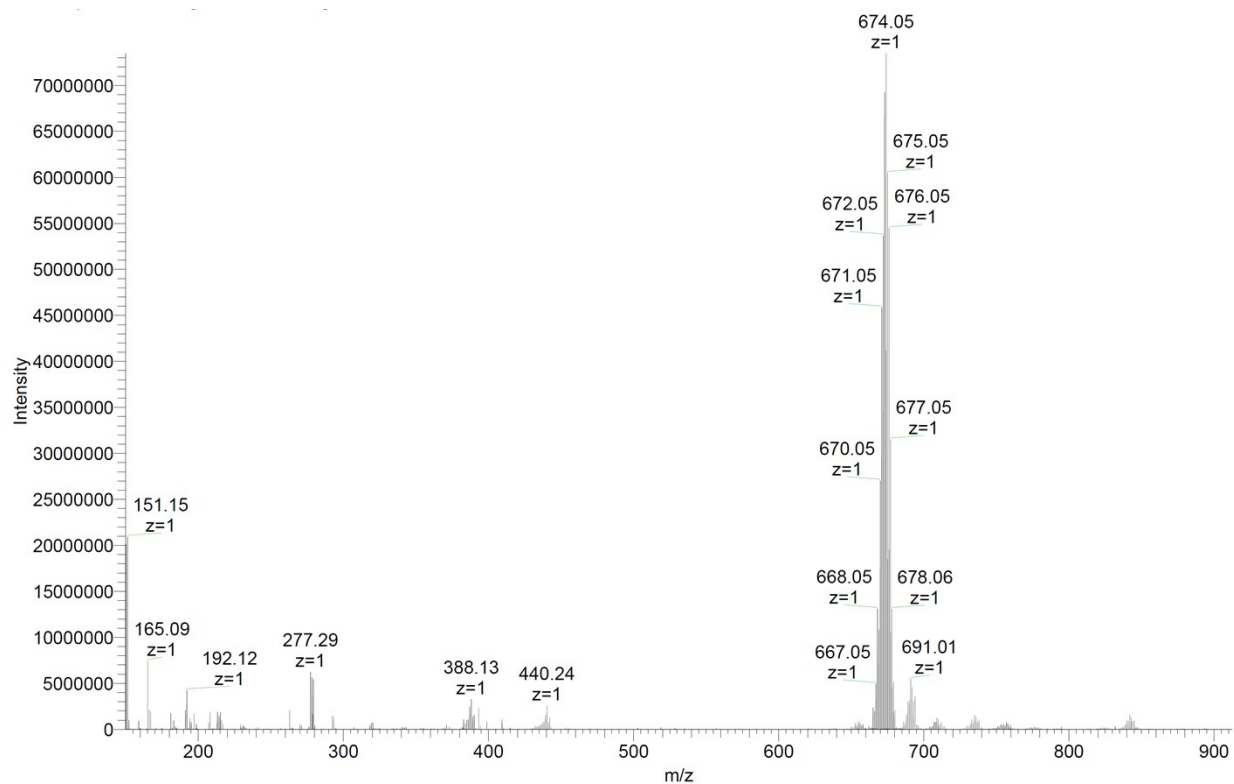

**Fig. S4** – ESI-MS spectrum of **2** dissolved in an acetone- $d_6$ /D $_2$ O mixture (ratio 4:6) recorded at pH 7, 24 h after sample preparation. The ion peak centred at  $m/z$  674.05 corresponds to the fully hydrolysed complex  $[(\eta^6\text{-}p\text{-MeC}_6\text{H}_4\text{Pr}')_2\text{Ru}_2(\text{OH})_2(\mu\text{-SCH}_2\text{-}p\text{-C}_6\text{H}_4\text{-NO}_2)]^+$ .

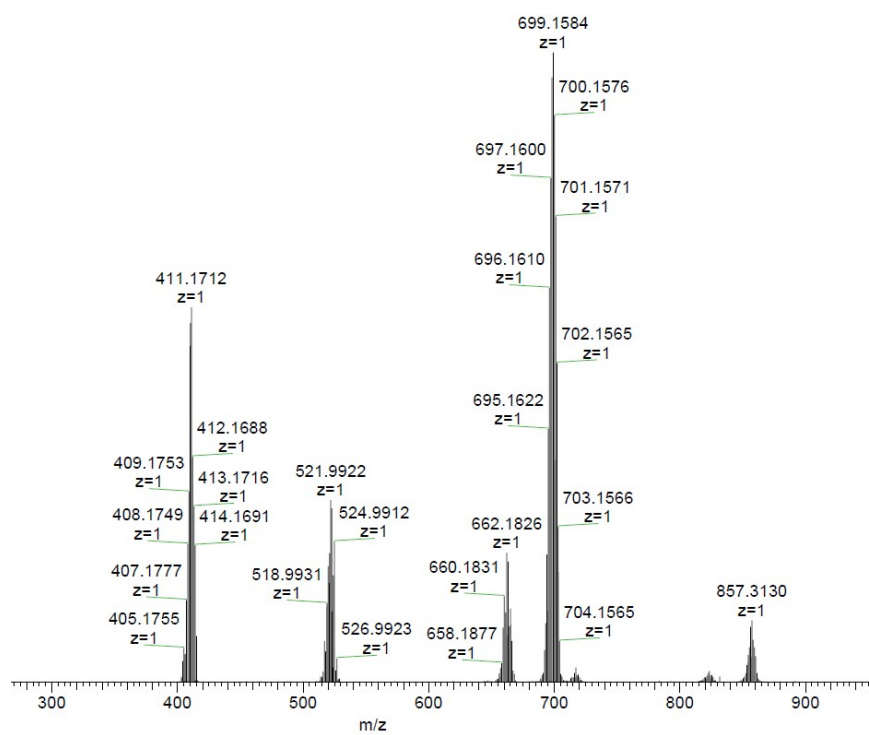

**Fig. S5** – ESI-MS spectrum of **1** dissolved in an acetone- $d_6$ / $D_2O$  mixture (ratio 3:7) recorded at pH 4, 24 h after sample preparation.

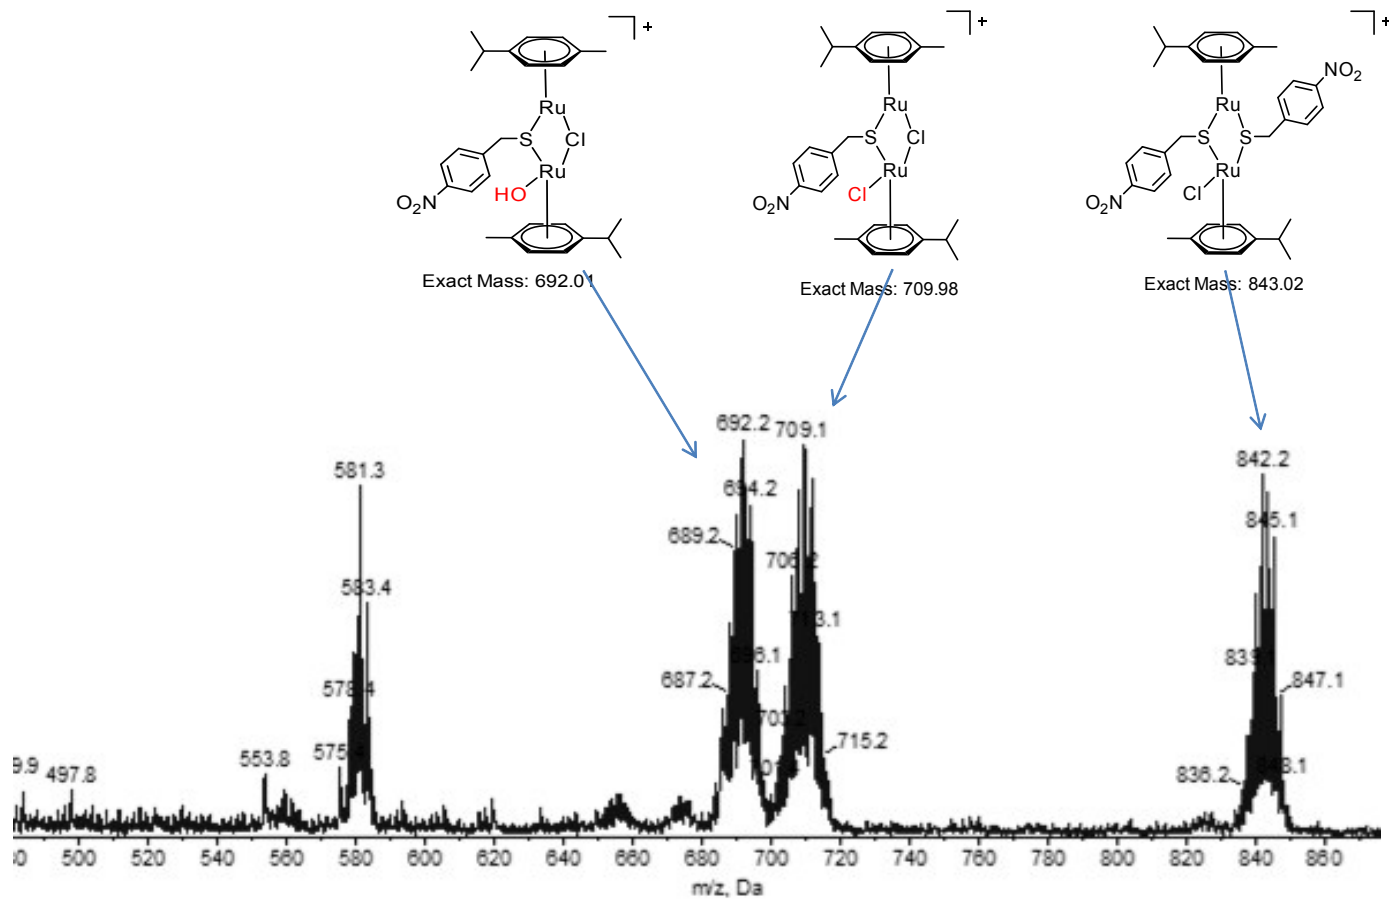

**Fig. S6** – ESI-MS spectrum of **2** dissolved in an acetone- $d_6$ /D $_2$ O mixture (ratio 4:6) recorded at pH 4, 24 h after sample preparation. The structures of the suggested species are indicated on top of each peak.



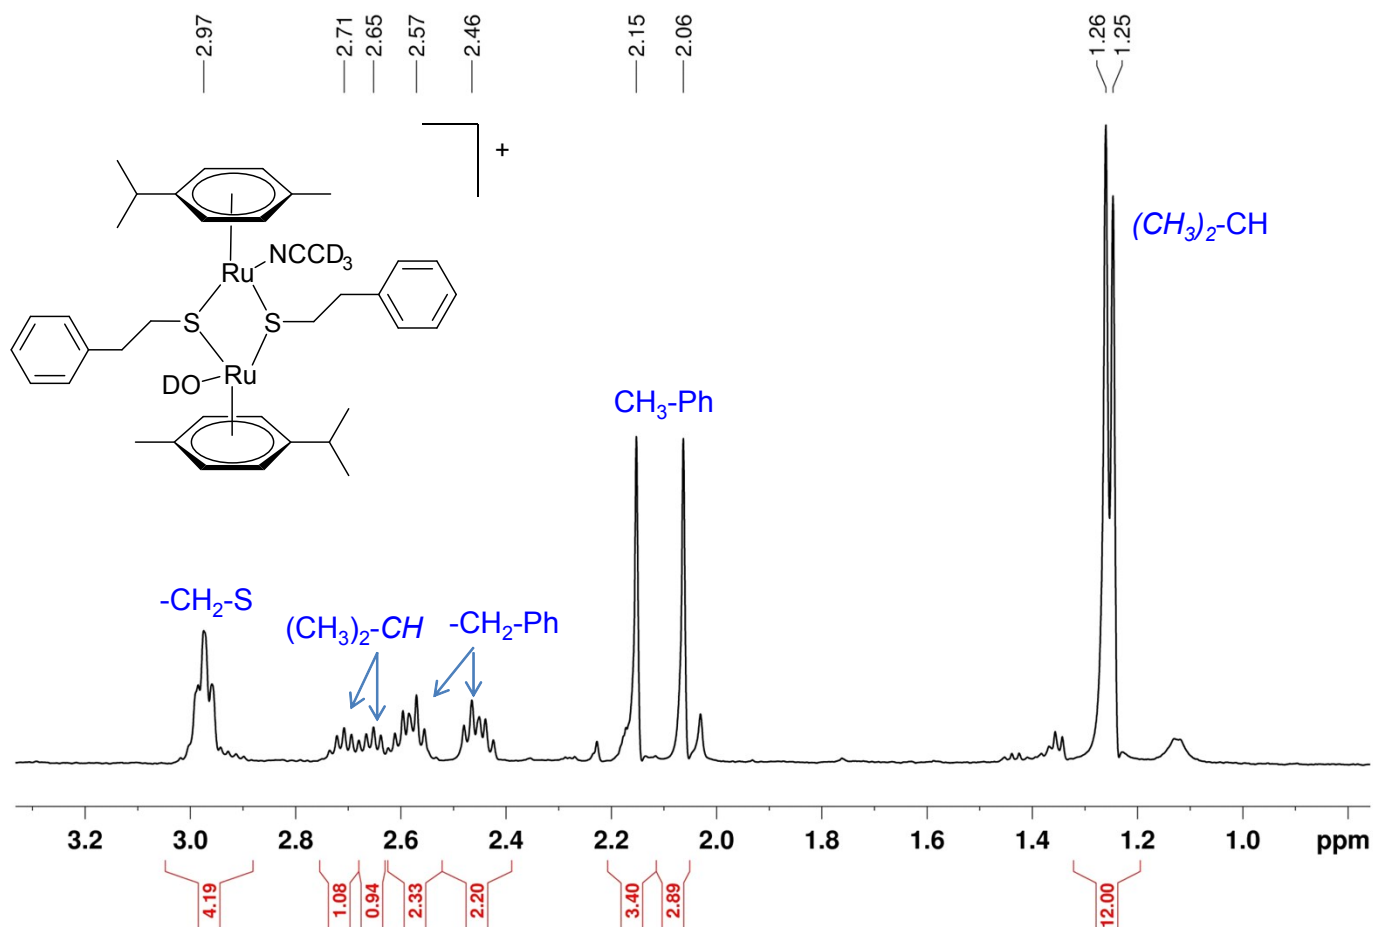

**Fig. S7** – The *p*-cymene proton region of the  $^1\text{H}$  NMR spectrum of  $[(\eta^6\text{-}p\text{-MeC}_6\text{H}_4\text{Pr}^i)_2\text{Ru}_2(\mu\text{-SC}_2\text{H}_4\text{Ph})_2\text{Cl}_2]$  (3) dissolved in  $\text{D}_2\text{O}/\text{CD}_3\text{CN}$  recorded 24 h after sample preparation, at 37 °C and at pD 7. The attribution of the different protons in the resulting hydroxo-acetonitrile cationic complex  $[(\eta^6\text{-}p\text{-MeC}_6\text{H}_4\text{Pr}^i)_2\text{Ru}_2(\text{OD})(\text{CD}_3\text{CN})(\mu\text{-S-C}_2\text{H}_4\text{Ph})_2]^+$  is shown in the spectrum.

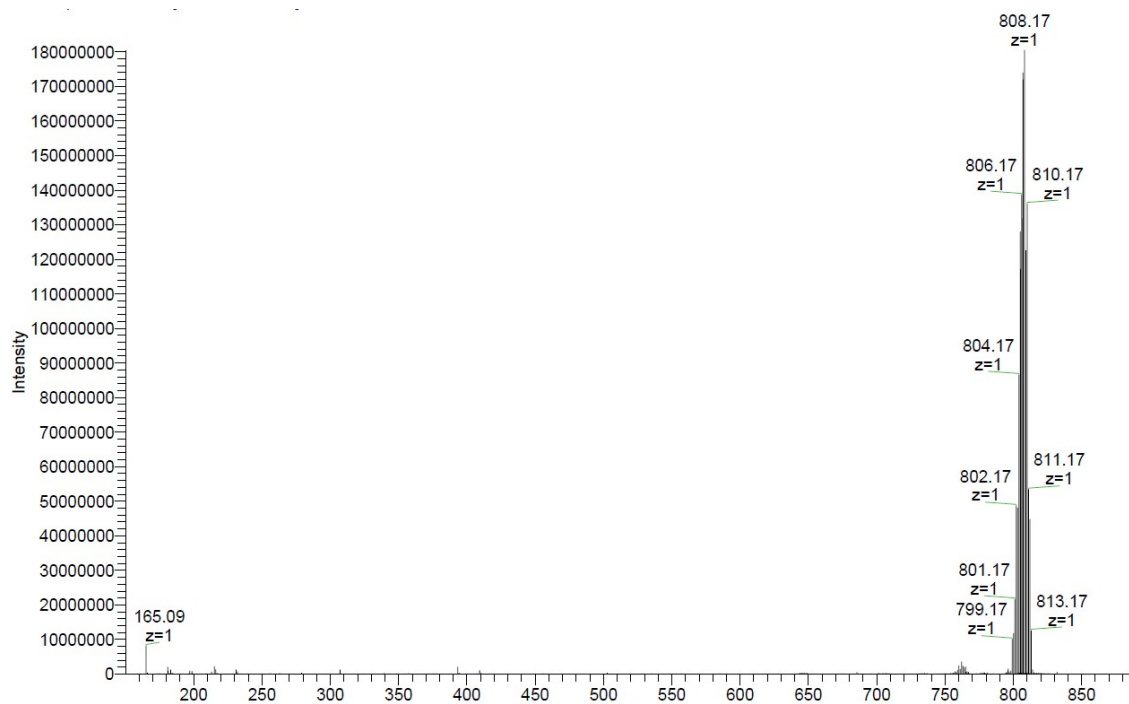

**Fig. S8** - ESI-MS spectrum of **3** recorded 24 h after sample preparation at pH 7. The peak centred at  $m/z = 808.17$  corresponds to the complex  $[(\eta^6\text{-}p\text{-MeC}_6\text{H}_4\text{Pr}^i)_2\text{Ru}_2(\text{OH})(\text{CH}_3\text{CN})(\mu\text{-SCH}_2\text{CH}_2\text{-C}_6\text{H}_5)_2]^+$ .

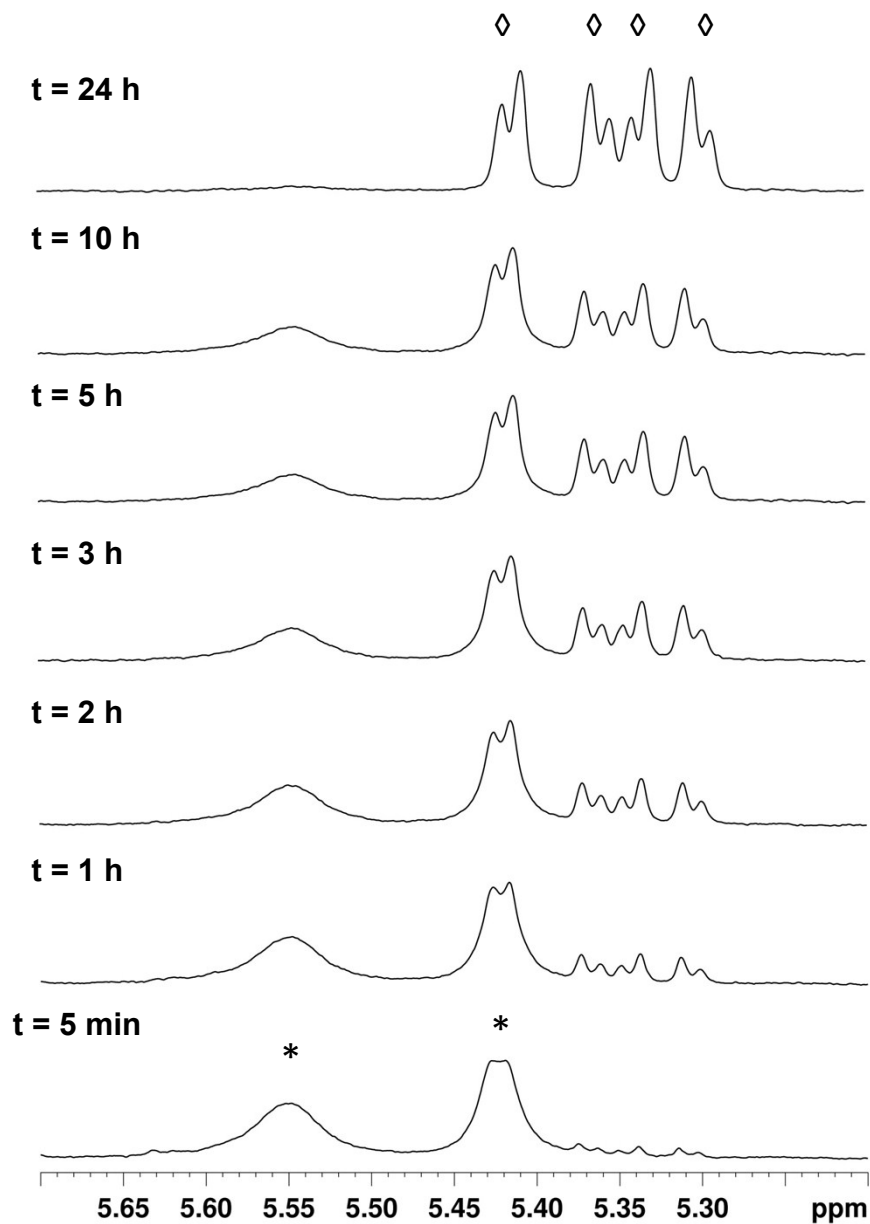

**Fig. S9** - The  $p$ -cymene ring proton region of the  $^1\text{H}$  NMR spectrum of **3** dissolved in a mixture  $\text{D}_2\text{O}/\text{CD}_3\text{CN}$  (ratio 7:3) at  $37^\circ\text{C}$  at different times at pD 11. The labels correspond to  $p$ -cymene ligands in different species present in solution. The species labelled \* corresponds to **3**, the species labelled ◇ is the hydroxo-acetonitrile complex  $[(\eta^6\text{-}p\text{-MeC}_6\text{H}_4\text{Pr}^i)_2\text{Ru}_2(\text{OD})(\text{CD}_3\text{CN})(\mu\text{-SCH}_2\text{CH}_2\text{-C}_6\text{H}_5)_2]^+$ .

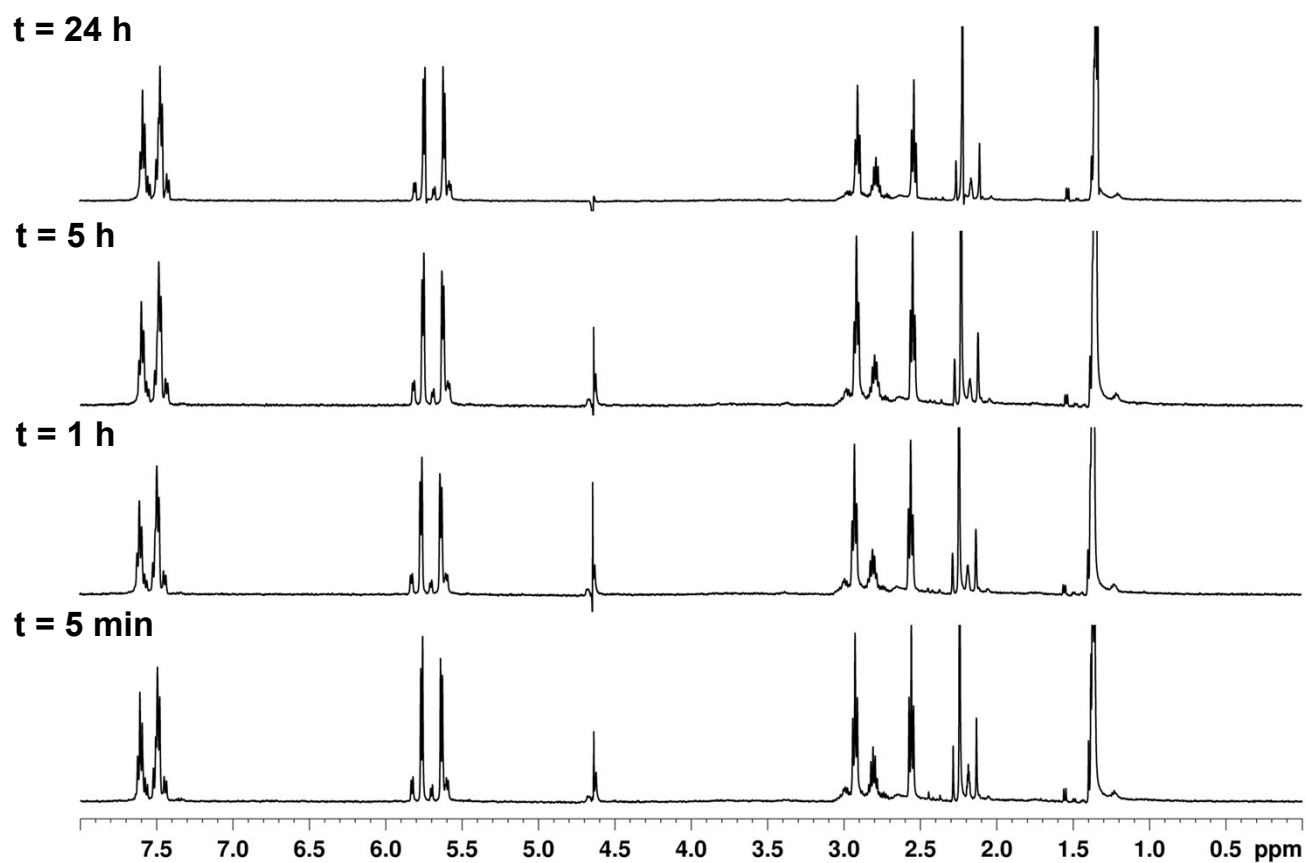

**Fig. S10** - NMR time-courses for the reaction of thiolato complex **3** dissolved in a mixture  $\text{D}_2\text{O}/\text{CD}_3\text{CN}$  (ratio 7:3) recorded at  $37\text{ }^\circ\text{C}$  and at pD 2.

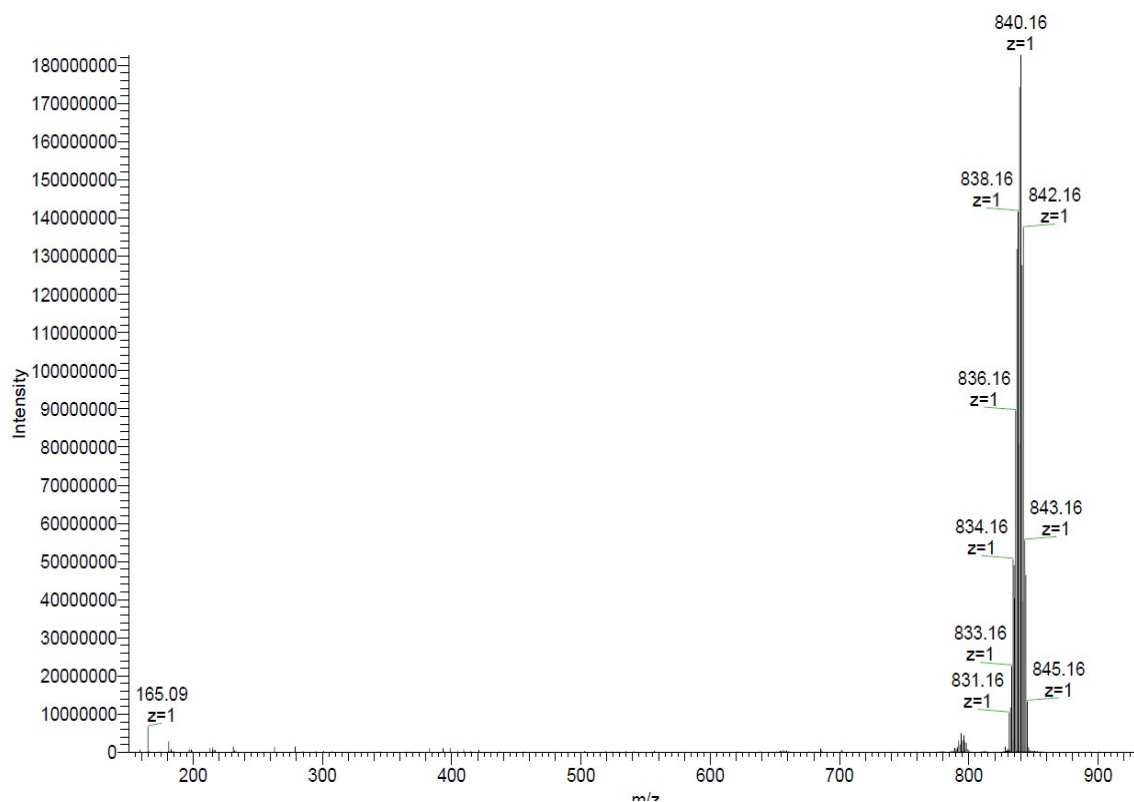

**Fig. S11** - ESI-MS spectrum of **4** dissolved in H<sub>2</sub>O/CH<sub>3</sub>CN, recorded 24 h after sample preparation at pH 7. The group of peaks centred at  $m/z = 840.16$  corresponds to the complex  $[(\eta^6\text{-}p\text{-MeC}_6\text{H}_4\text{Pr}^i)_2\text{Ru}_2(\text{OH})(\text{CH}_3\text{CN})(\mu\text{-SCH}_2\text{-C}_6\text{H}_4\text{-}p\text{-OMe})_2]^+$ .

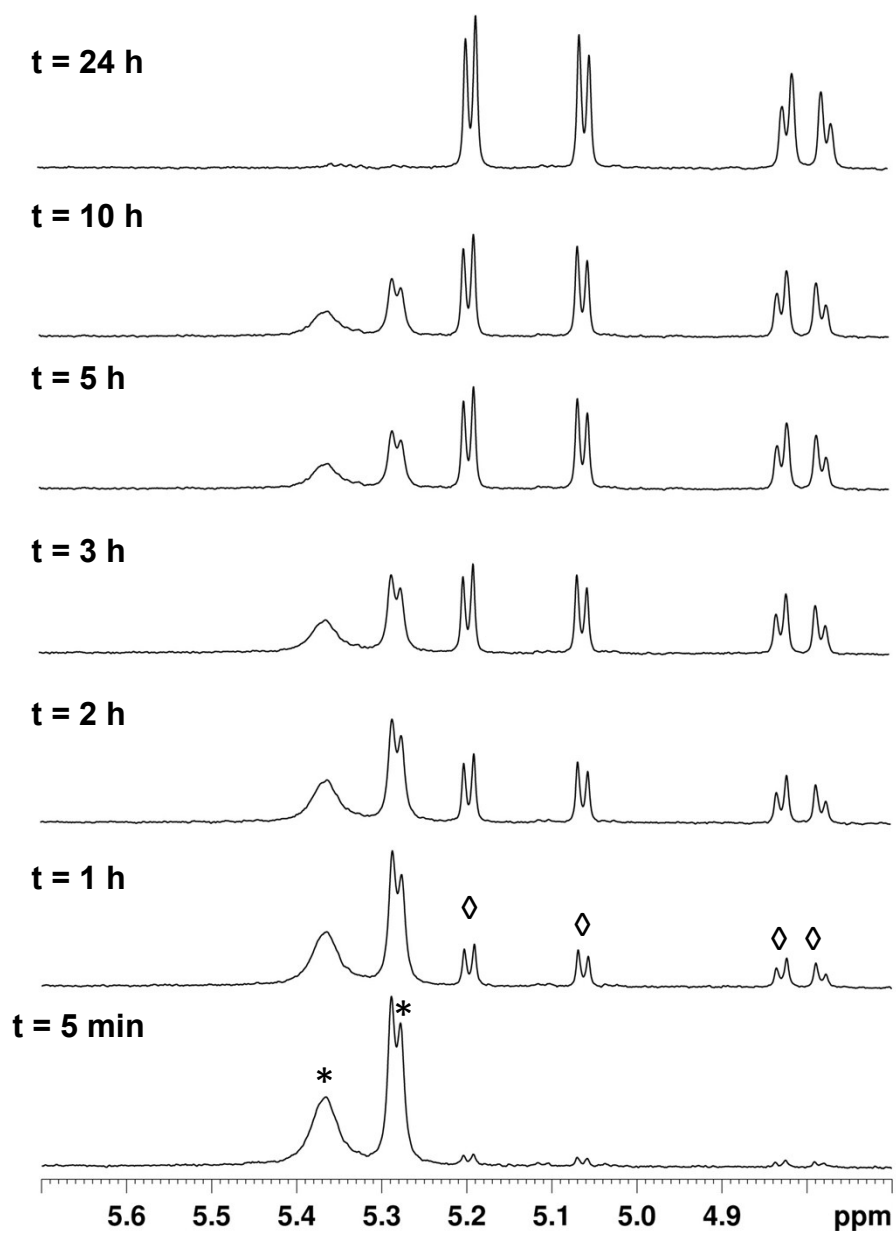

**Fig. S12** - The *p*-cymene ring proton region of the <sup>1</sup>H NMR spectrum of **4** dissolved in a mixture D<sub>2</sub>O/CD<sub>3</sub>CN (ratio 7:3) at 37 °C at pD 11. The labels correspond to *p*-cymene ligands in different species present in solution. The species labelled \* is the complex **4**, the species labelled ◊ is the hydroxo-acetonitrile complex complex  $[(\eta^6\text{-}p\text{-MeC}_6\text{H}_4\text{Pr}^i)_2\text{Ru}_2(\text{OD})(\text{CD}_3\text{CN})(\mu\text{-SCH}_2\text{-C}_6\text{H}_4\text{-}p\text{-OMe})_2]^+$ .

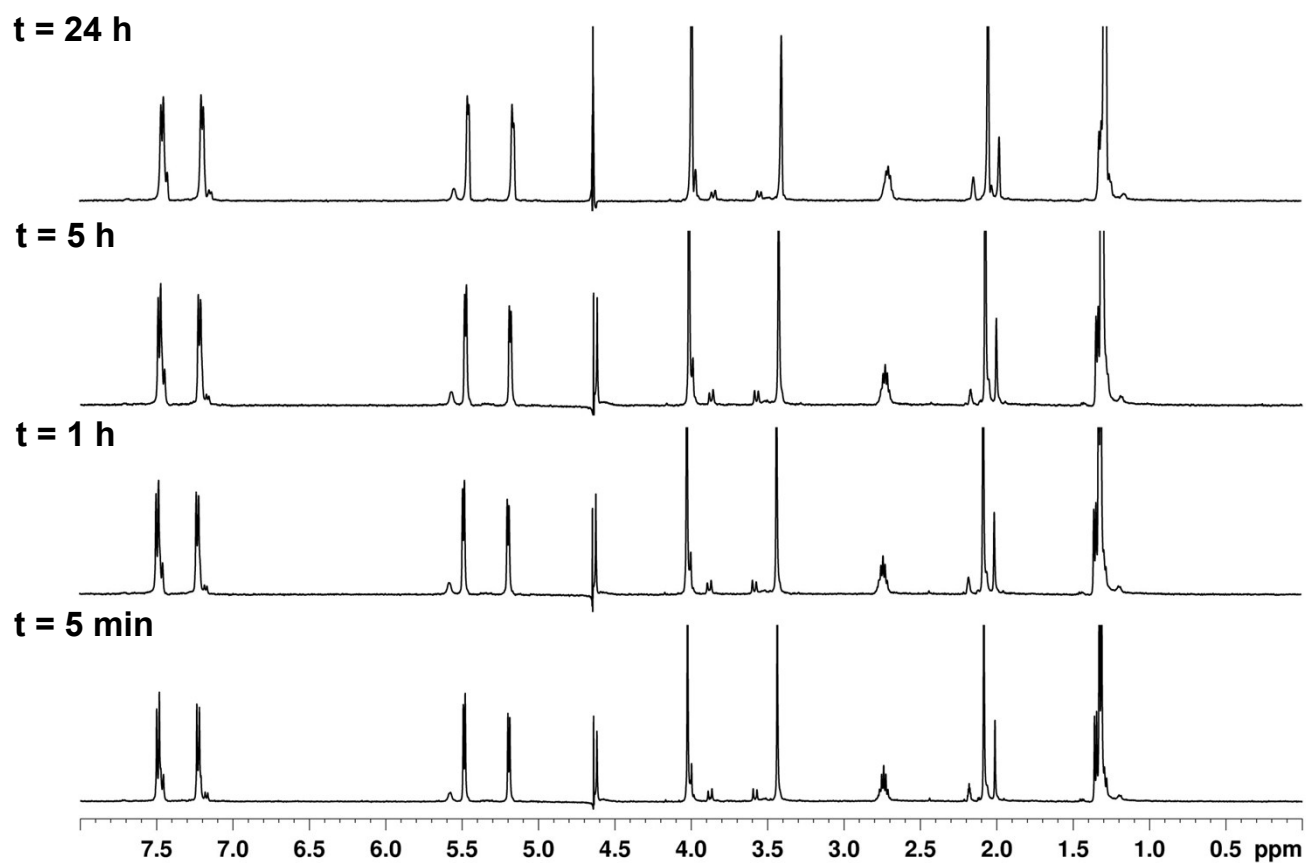

**Fig. S13** - NMR time-courses for the reaction of thiolato complex **4** dissolved in a mixture  $\text{D}_2\text{O}/\text{CD}_3\text{CN}$  (ratio 7:3) recorded at  $37^\circ\text{C}$  and at pD 2.

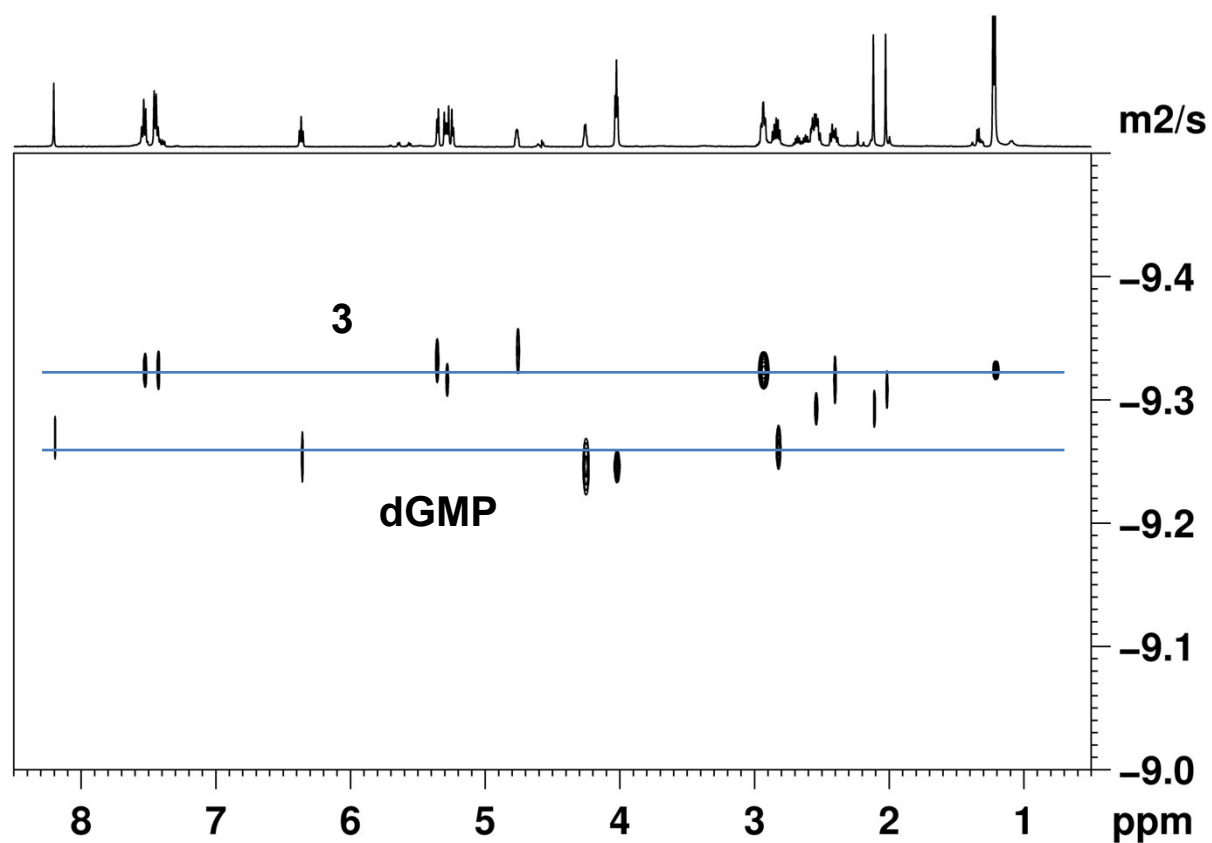

**Fig. S14** - 2D-<sup>1</sup>H DOSY spectrum of the mixture **3**:dGMP (ratio 1:3) dissolved in a mixture D<sub>2</sub>O/CD<sub>3</sub>CN (ratio 7:3) recorded hydroxo-acetonitrile complex at 37 °C.



Negative mode

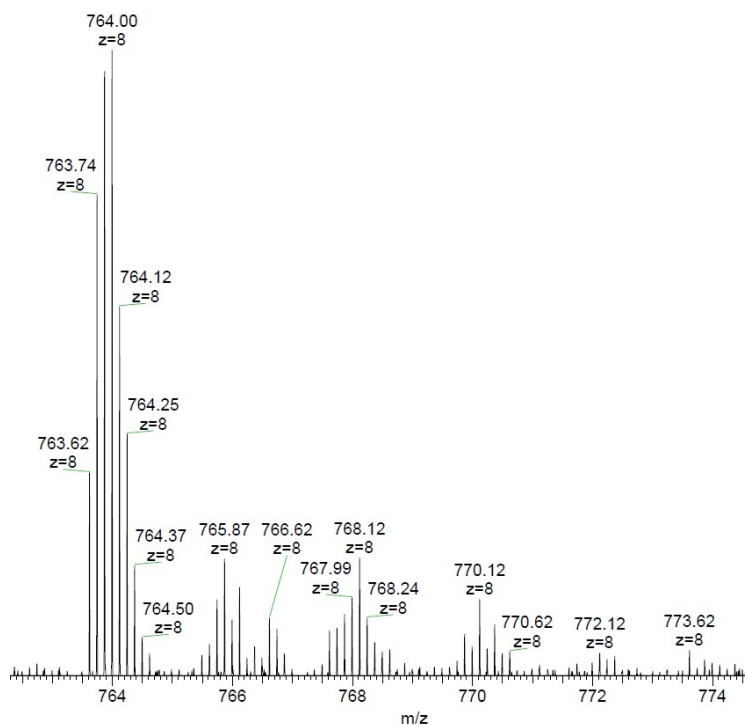

Positive mode

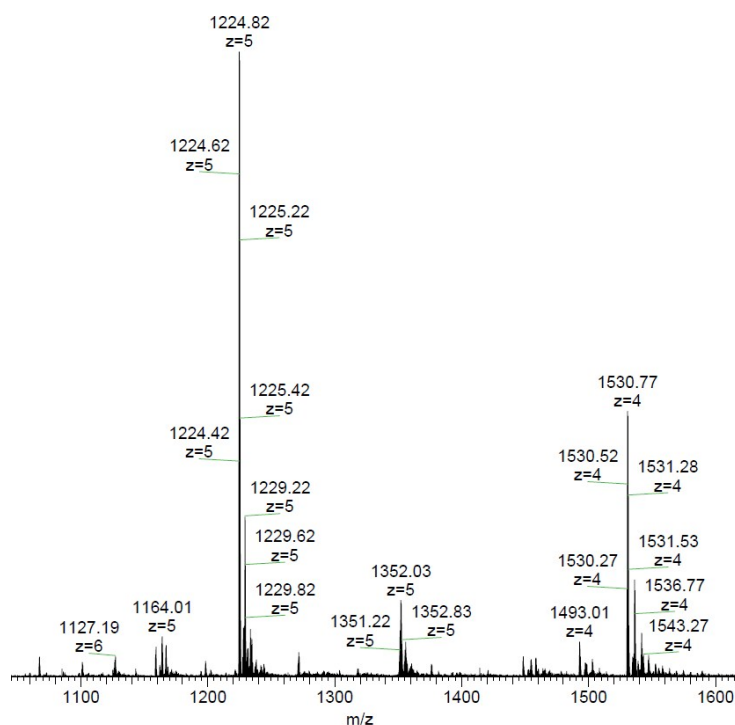

**Fig. S15** - ESI-MS spectra of the mixture **2**: DNA 20-mer recorded in the negative and positive modes recorded 24 h after sample preparation.

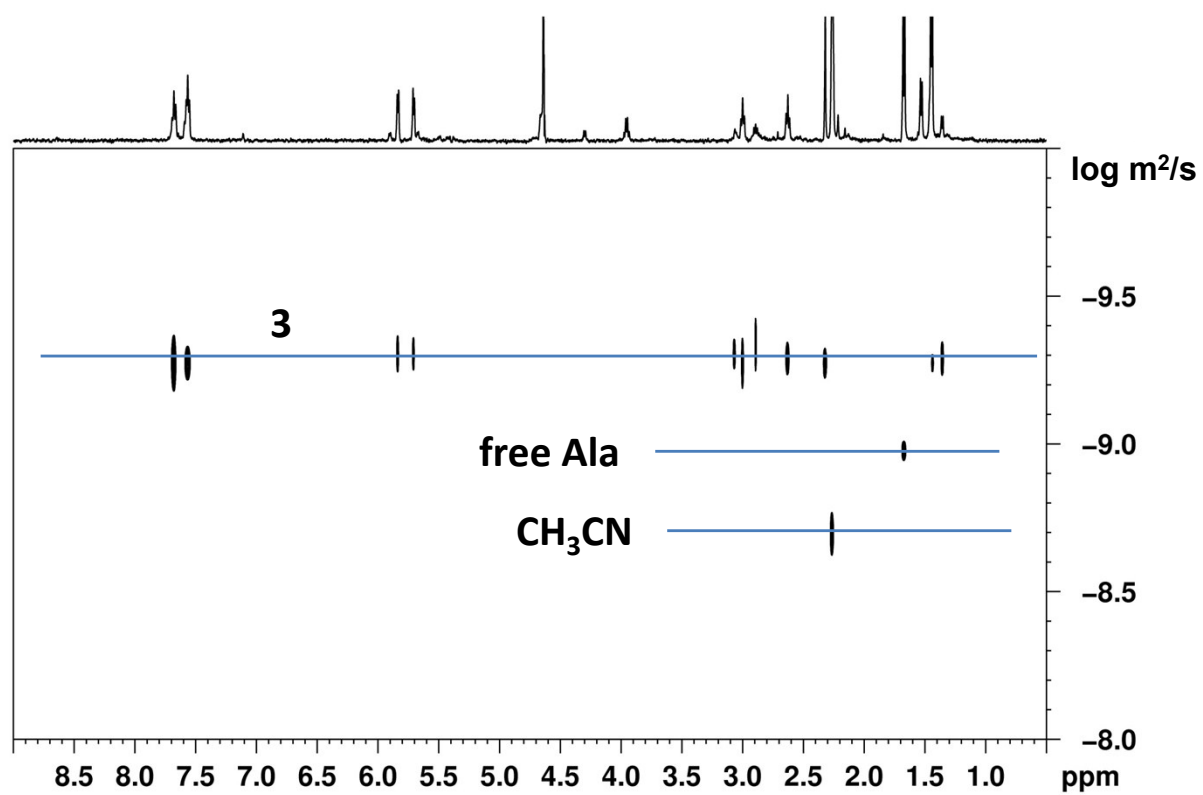

**Fig. S16** - 2D-<sup>1</sup>H DOSY spectrum of the mixture **3**:Ala (ratio 1:3) dissolved in a mixture D<sub>2</sub>O/CD<sub>3</sub>CN (ratio 7:3) recorded 24 h after sample preparation at 37 °C.

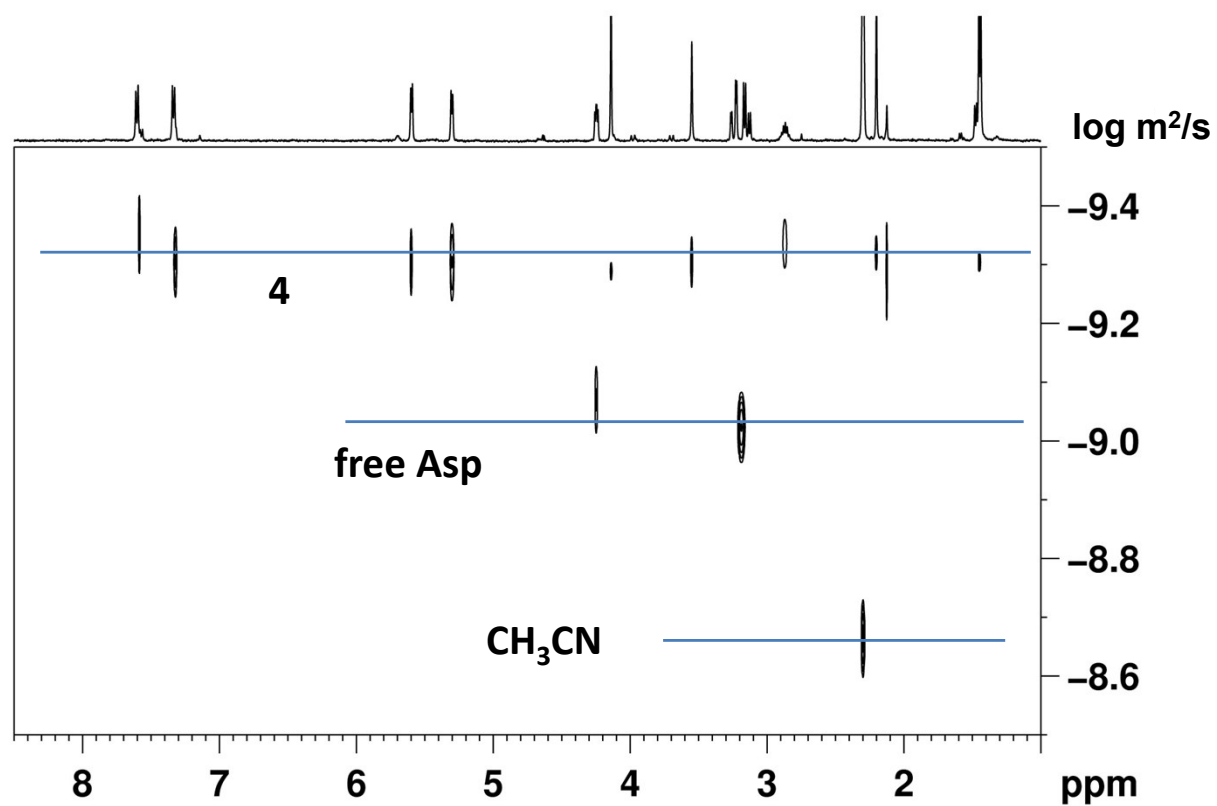

**Fig. S17** - 2D-<sup>1</sup>H DOSY spectrum of the mixture 4:Asp (ratio 1:3) dissolved in a mixture D<sub>2</sub>O/CD<sub>3</sub>CN (ratio 7:3) recorded 24 h after sample preparation at 37 °C.

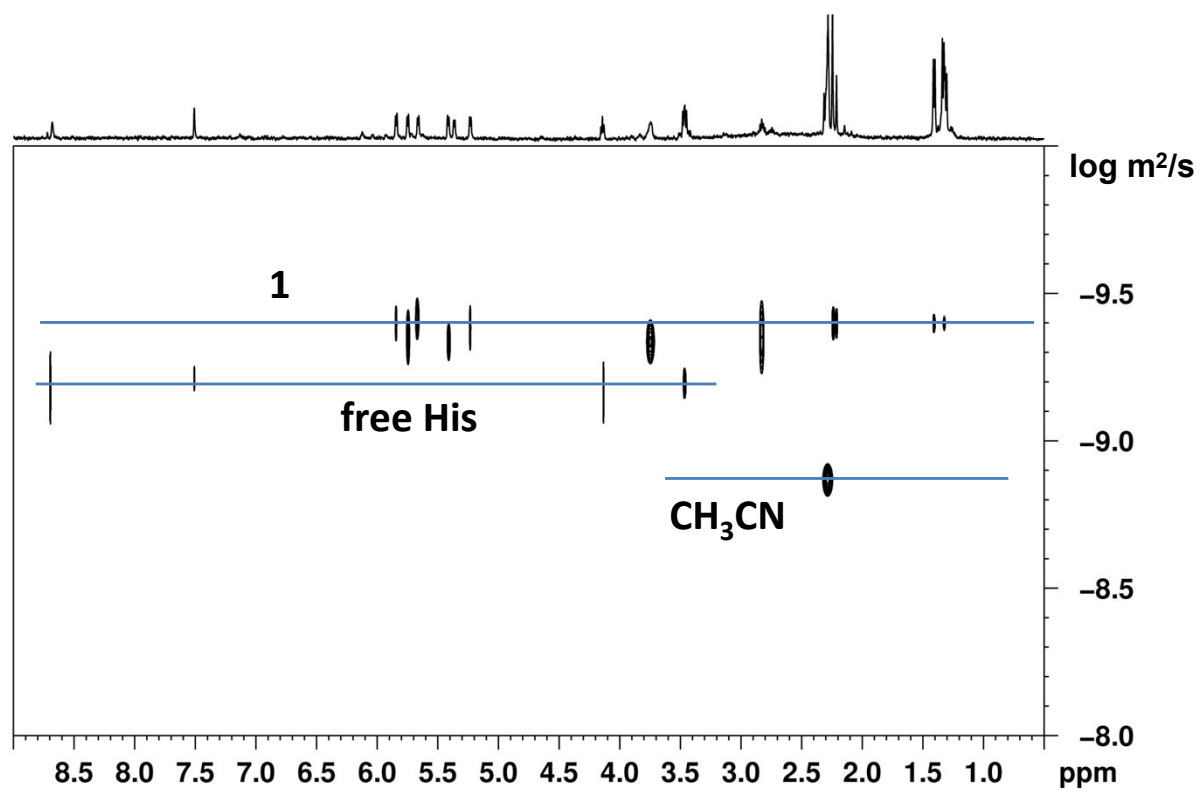

**Fig. S18** - 2D-<sup>1</sup>H DOSY spectrum of the mixture **1**:His (ratio 1:3) dissolved in a mixture D<sub>2</sub>O/acetone-d<sub>6</sub> (ratio 6:4) recorded 24 h after sample preparation at 37 °C.

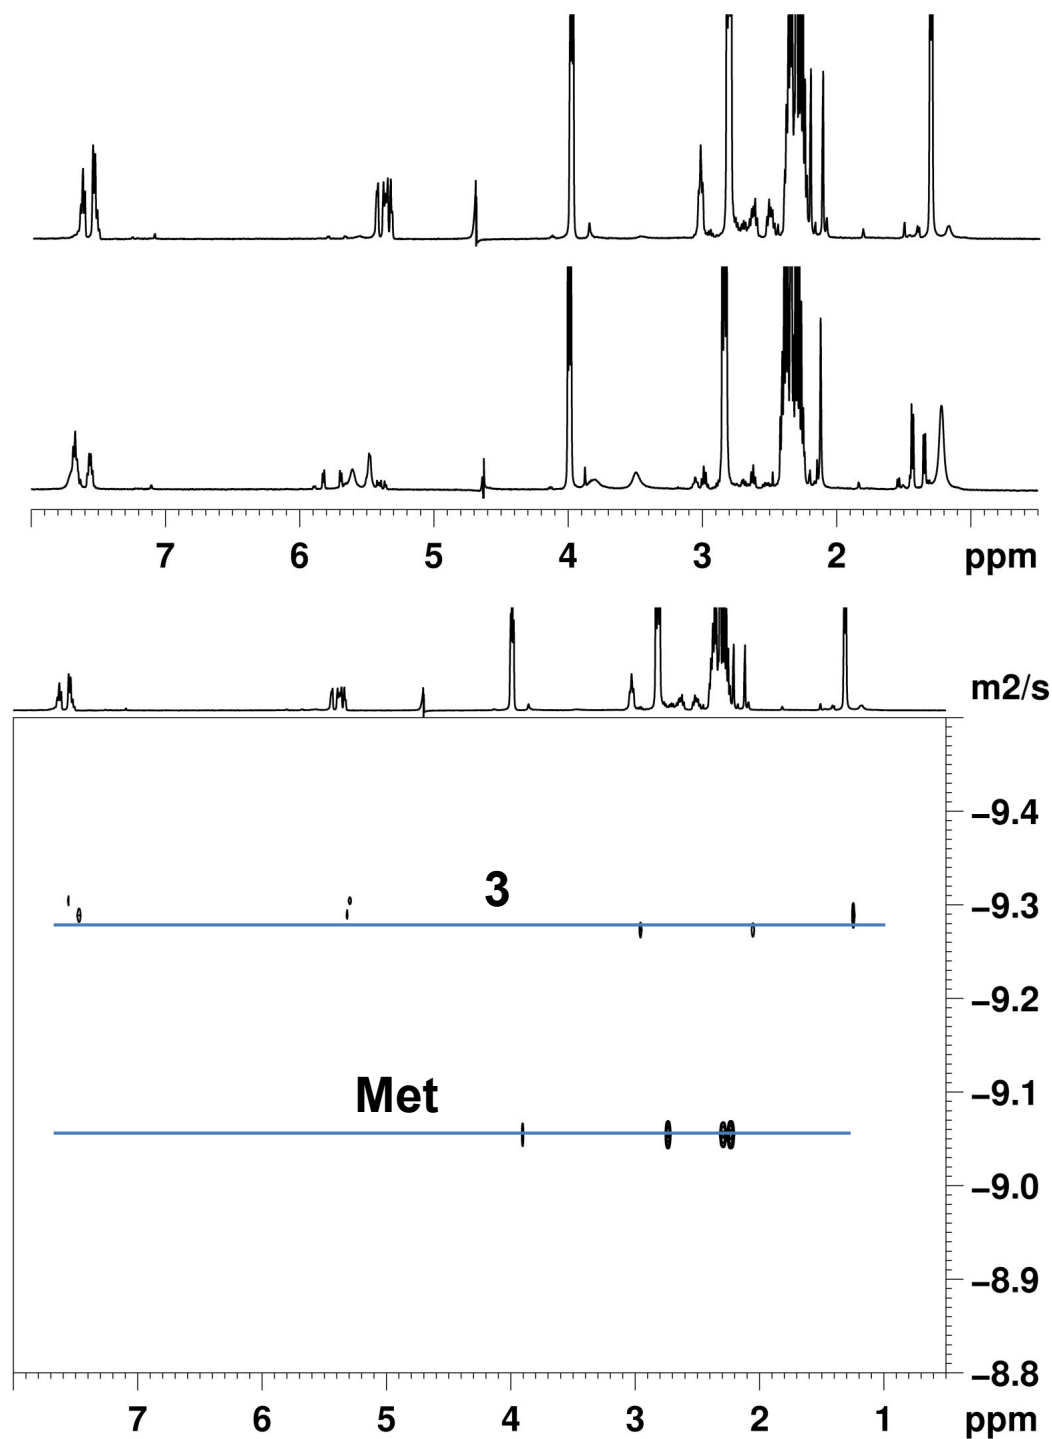

**Fig. S19** - Top: 1D  $^1\text{H}$  NMR spectrum of the mixture **3**:Met (ratio 1:4) dissolved in a mixture  $\text{D}_2\text{O}/\text{CD}_3\text{CN}$  (ratio 7:3) recorded 24 h after sample preparation. Middle: 1D  $^1\text{H}$  NMR spectrum recorded 10 min after sample preparation. Bottom: 2D- $^1\text{H}$  DOSY spectrum recorded 48 h after sample preparation at 37 °C.

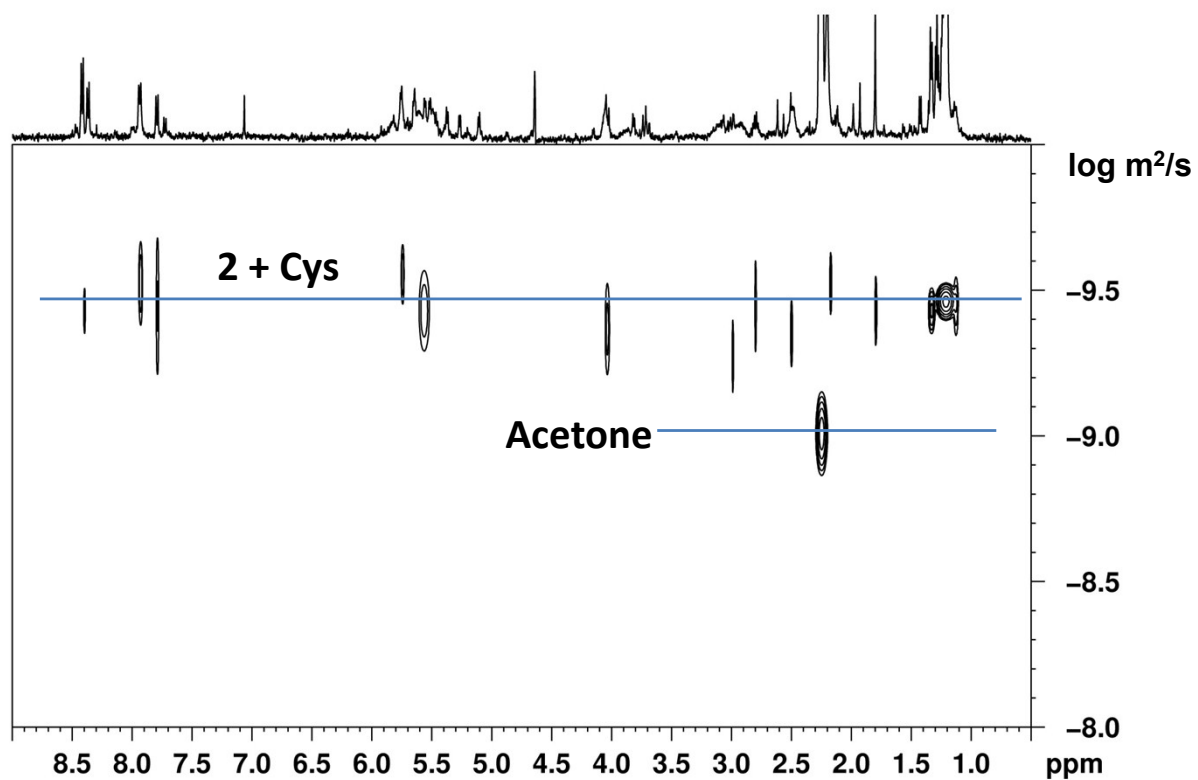

**Fig. S20** - 2D- $^1\text{H}$  DOSY spectrum of the mixture **1**:Cys (ratio 1:4) dissolved in a mixture  $\text{D}_2\text{O}$ /acetone- $\text{d}_6$  (ratio 6:4) recorded 24 h after sample preparation at 37  $^\circ\text{C}$ .

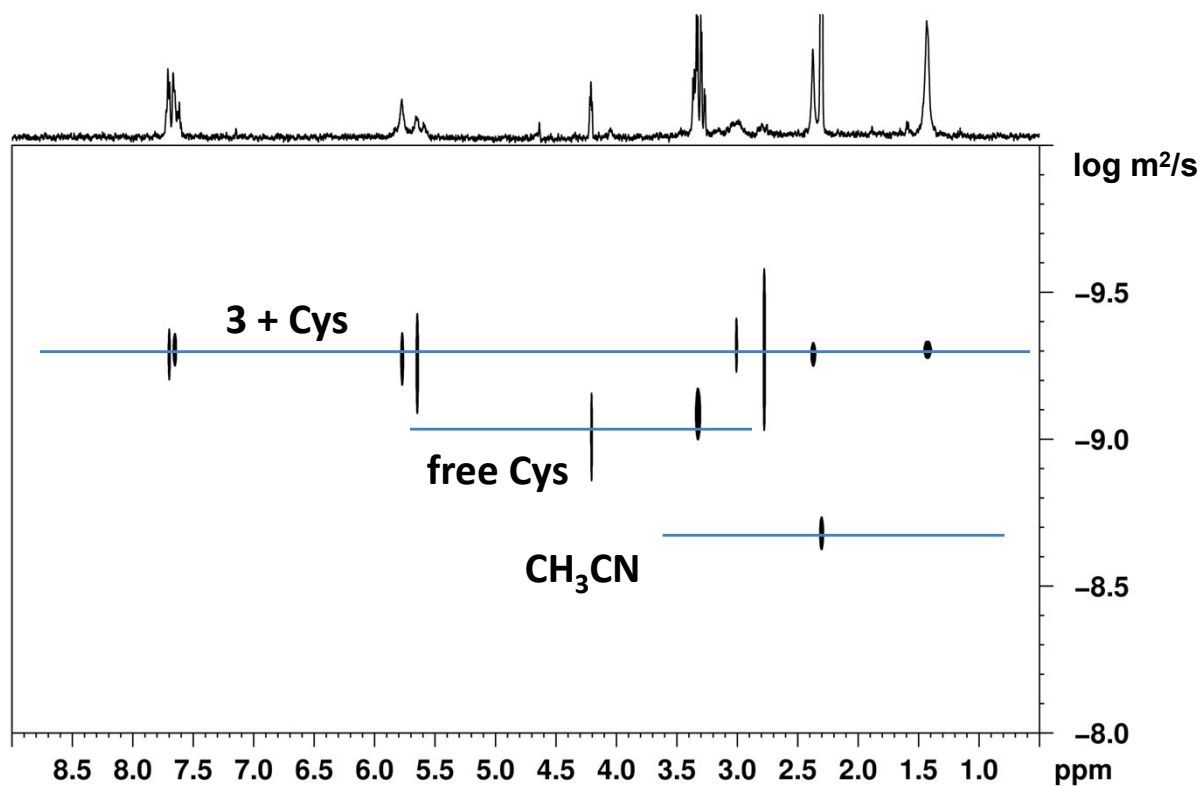

**Fig. S21** - 2D-<sup>1</sup>H DOSY spectrum of the mixture **3**:Cys (ratio 1:3) dissolved in a mixture D<sub>2</sub>O/CD<sub>3</sub>CN (ratio 7:3) recorded 24 h after sample preparation at 37 °C.

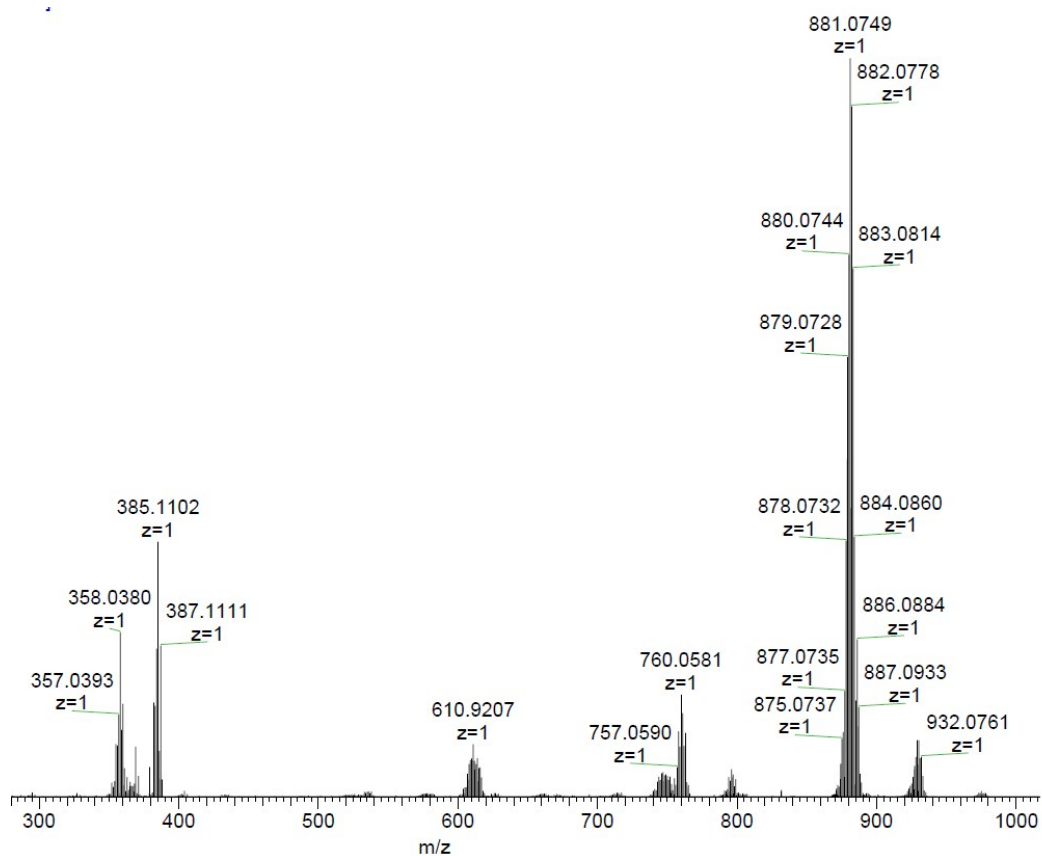

**Fig. S22** - ESI-MS spectrum of the mixture **2**:Cys recorded in the negative mode recorded 24 h after sample preparation. The peak centred at  $m/z = 881.07$  corresponds to the complex  $[(\eta^6\text{-}p\text{-MeC}_6\text{H}_4\text{Pr}^i)_2\text{Ru}_2(\mu\text{-SCH}_2\text{CH}(\text{NH}_2)\text{COOH})_2(\mu\text{-SCH}_2\text{-}p\text{-C}_6\text{H}_4\text{-NO}_2)]^+$ .



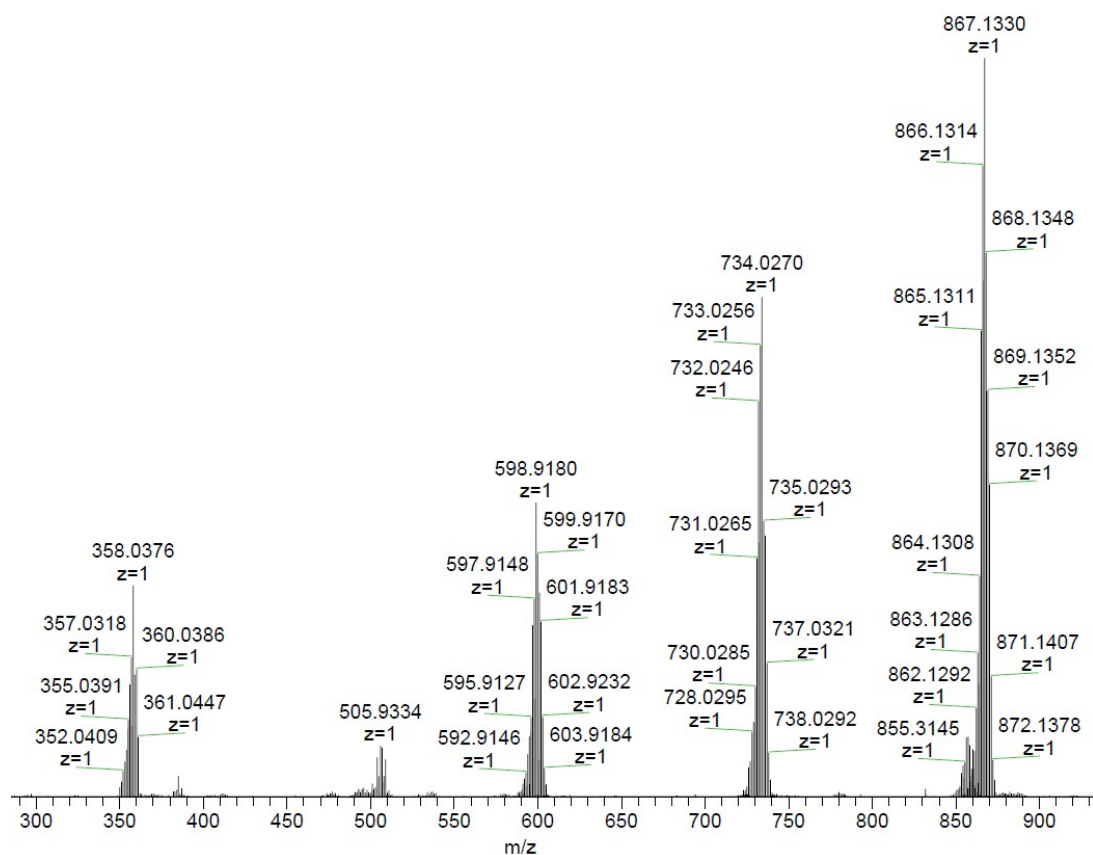

**Fig. S23** - ESI-MS spectra of the mixture of **3**:Cys recorded in the negative mode recorded 24 h after sample preparation. The peak centred at  $m/z = 867.13$  corresponds to the complex  $[(\eta^6\text{-}p\text{-MeC}_6\text{H}_4\text{Pr}^i)_2\text{Ru}_2(\mu\text{-SCH}_2\text{CH}(\text{NH}_2)\text{COOH})(\mu\text{-SCH}_2\text{CH}_2\text{-C}_6\text{H}_5)_2]^+$ .

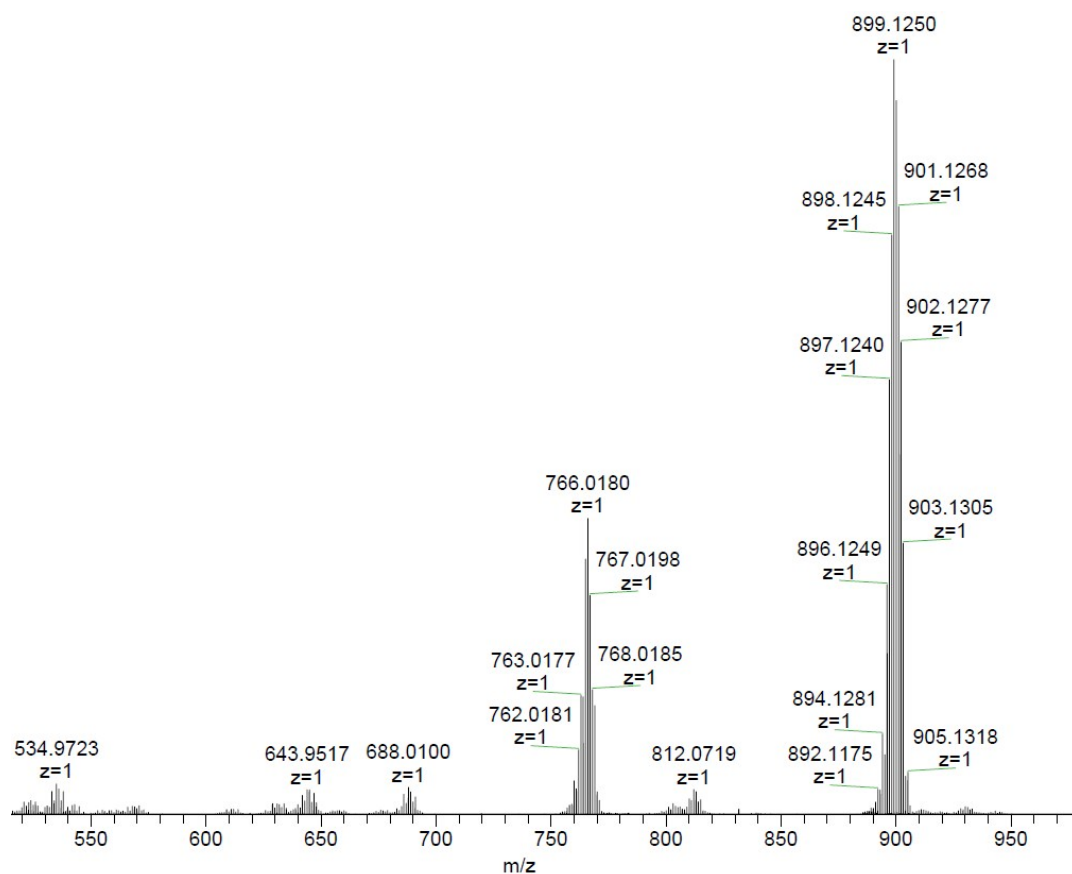

**Fig. S24** - ESI-MS spectra of the mixture of **4**:Cys recorded in the negative mode recorded 24 h after sample preparation. The peak centred at  $m/z = 899.13$  corresponds to the complex  $[(\eta^6\text{-p-MeC}_6\text{H}_4\text{Pr}^i)_2\text{Ru}_2(\mu\text{-SCH}_2\text{CH}(\text{NH}_2)\text{COOH})(\mu\text{-SCH}_2\text{-C}_6\text{H}_4\text{-p-OMe})_2]^+$ .
